# Supplementary material
Source: PubMed Central journal article supplement (PMC3711863)
Supplement: NIHMS471832-supplement-supplement_1.pdf [file NIHMS471832-supplement-supplement_1.pdf]

|                       |                                                                                                                            |
|-----------------------|----------------------------------------------------------------------------------------------------------------------------|
| <b>Article Title:</b> | Medial ganglionic eminence–like cells derived from human embryonic stem cells correct learning and memory deficits         |
| <b>Author:</b>        | Yan Liu, Jason Weick, Huisheng Liu, Robert Krencik, Xiaoqing Zhang, Lixiang Ma, Guo-min Zhou, Melvin Ayala & Su-Chun Zhang |
|                       |                                                                                                                            |

| <b>Supplementary item and number (e.g., Supplementary Fig. 1)</b> | <b>Title or caption (this should match what is in the PDF)</b>                      |
|-------------------------------------------------------------------|-------------------------------------------------------------------------------------|
| Supplementary Fig. 1                                              | Effects of timing and dosage of SHH on progenitor induction.                        |
| Supplementary Fig. 2                                              | Electrophysiological properties of hESC-derived neurons.                            |
| Supplementary Fig. 3                                              | Characteristics of grafted human cells                                              |
| Supplementary Fig. 4                                              | Subtypes and electrophysiological properties of grafted human neurons.              |
| Supplementary Fig. 5                                              | Transplantation of hESC-derived MGE progenitors contributes to functional recovery. |
| Supplementary Table 1                                             |                                                                                     |
| Supplementary Table 2                                             |                                                                                     |
| Supplementary Table 3                                             |                                                                                     |
| Supplementary Table 4                                             |                                                                                     |

# Supplementary Figure 1 (Zhang)

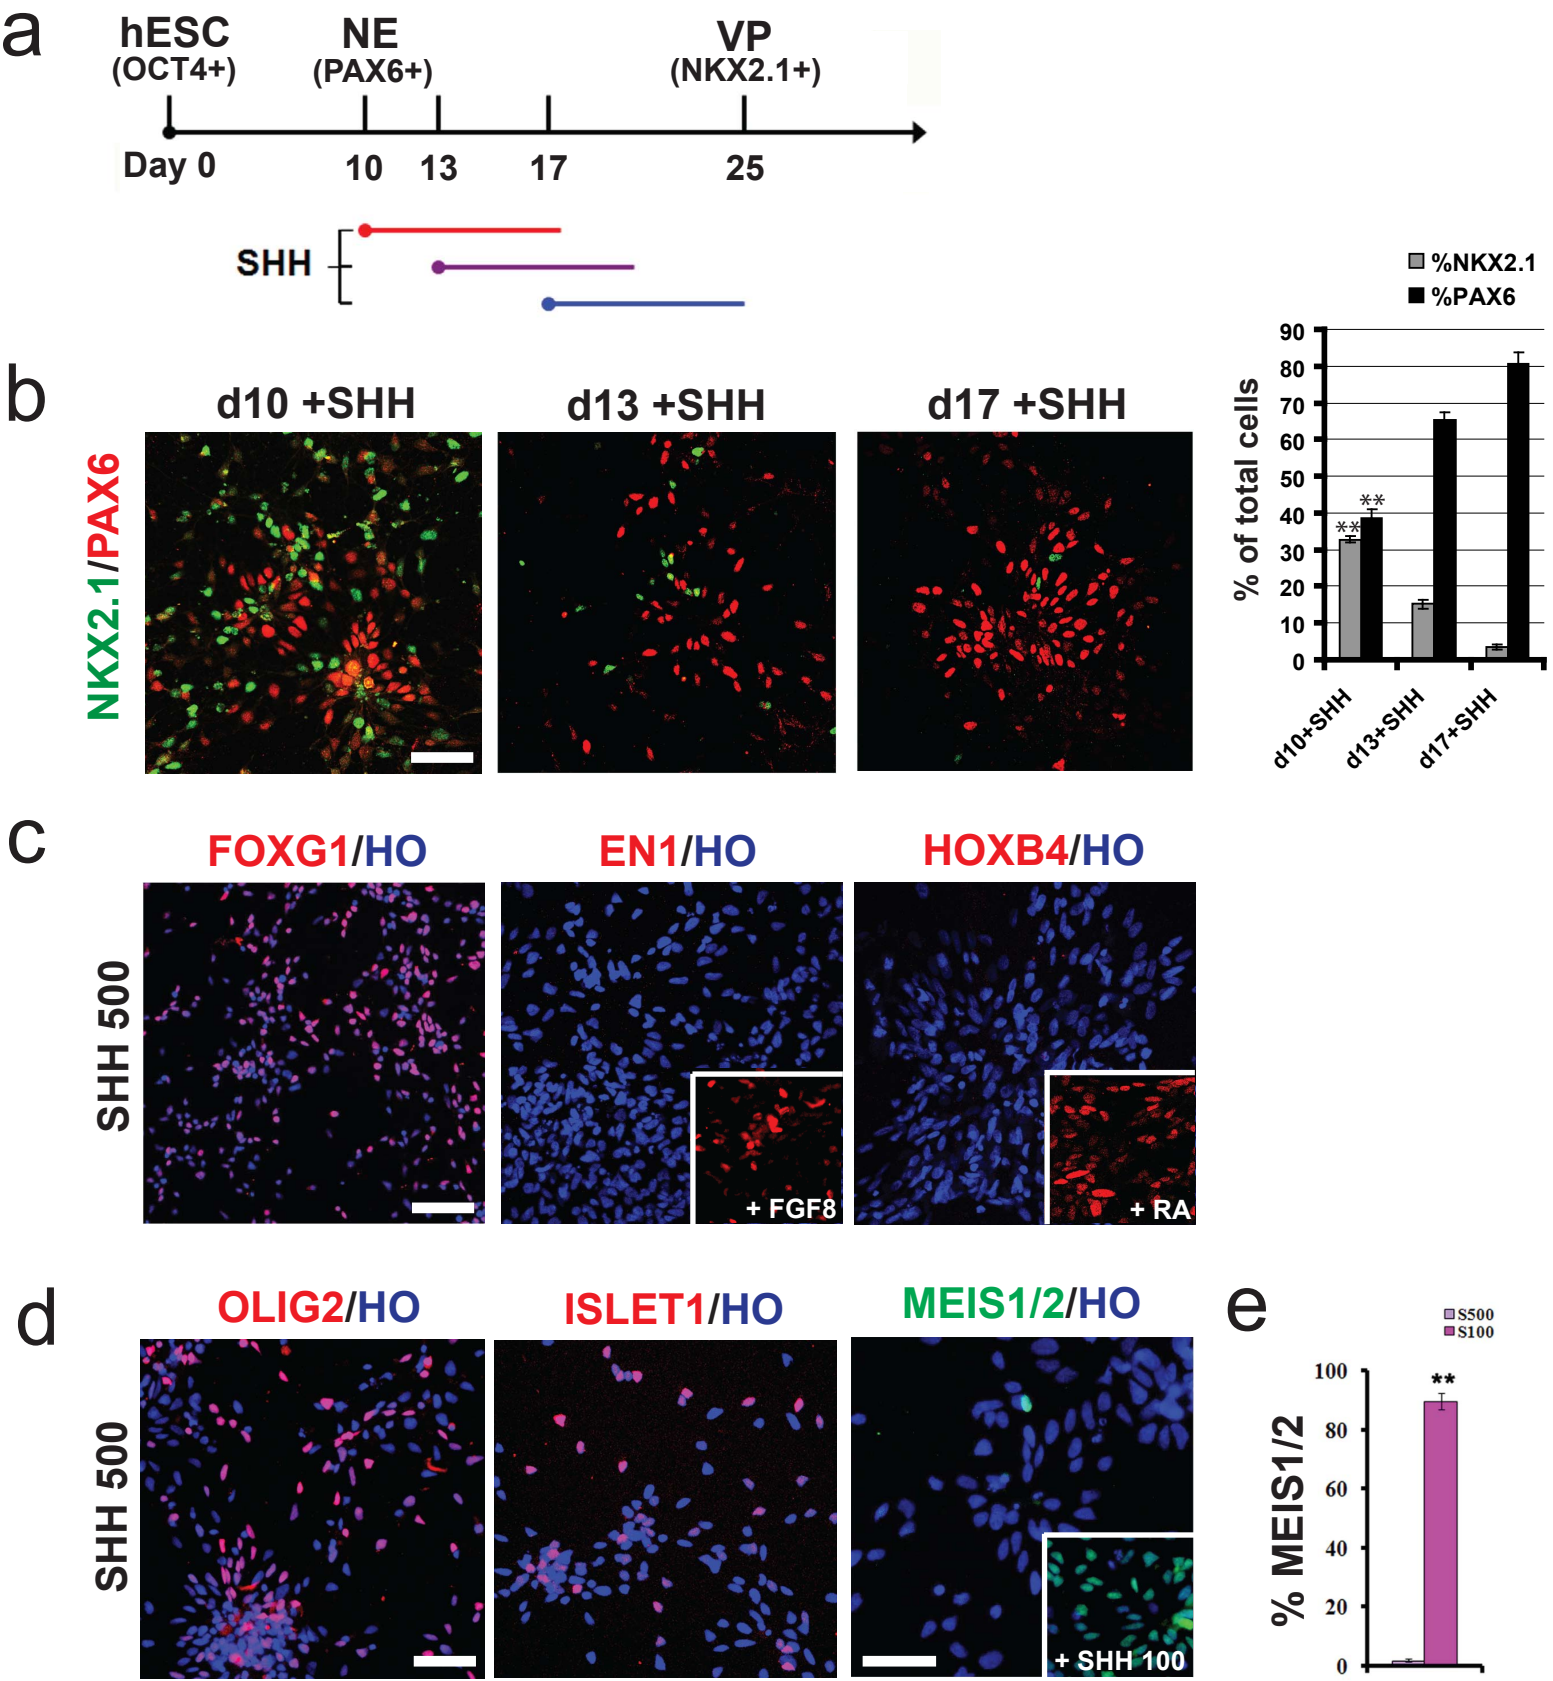

**Supplementary figure 1. Effects of timing and dosage of SHH on progenitor induction.** (A) Schematic of SHH application at different time points. (B) More NKX2.1- and fewer PAX6-expressing cells were present in cultures at day 25 when 200ng/ml SHH was applied at day-10 than at day-13 or day 17 for 7 days. Quantification graph is on right. \* $p < 0.05$  when compared to day 13 and 17. (C) The majority of the cells at day 25 are positive for FOXG1 ( $89 \pm 1.9\%$ ), but none for EN1 or HOXB4 after SHH treatment. Insets are positive controls for EN1 and HOXB4 immunostaining following treatment with FGF8 and RA, respectively. (D) Neural progenitors induced by high concentrations of SHH (500-1000 ng/ml) also express OLIG2 ( $40 \pm 3.4\%$ ) and ISLET1 ( $21 \pm 3.1\%$ ) but hardly any for a striatal marker MEIS1/2. Inset is LGE cells generated with 100ng/ml SHH, which express MEIS1/2. (E) Quantification for MEIS1/2. Scale bar=50  $\mu$ m.

# Supplementary Figure 2 (Zhang)

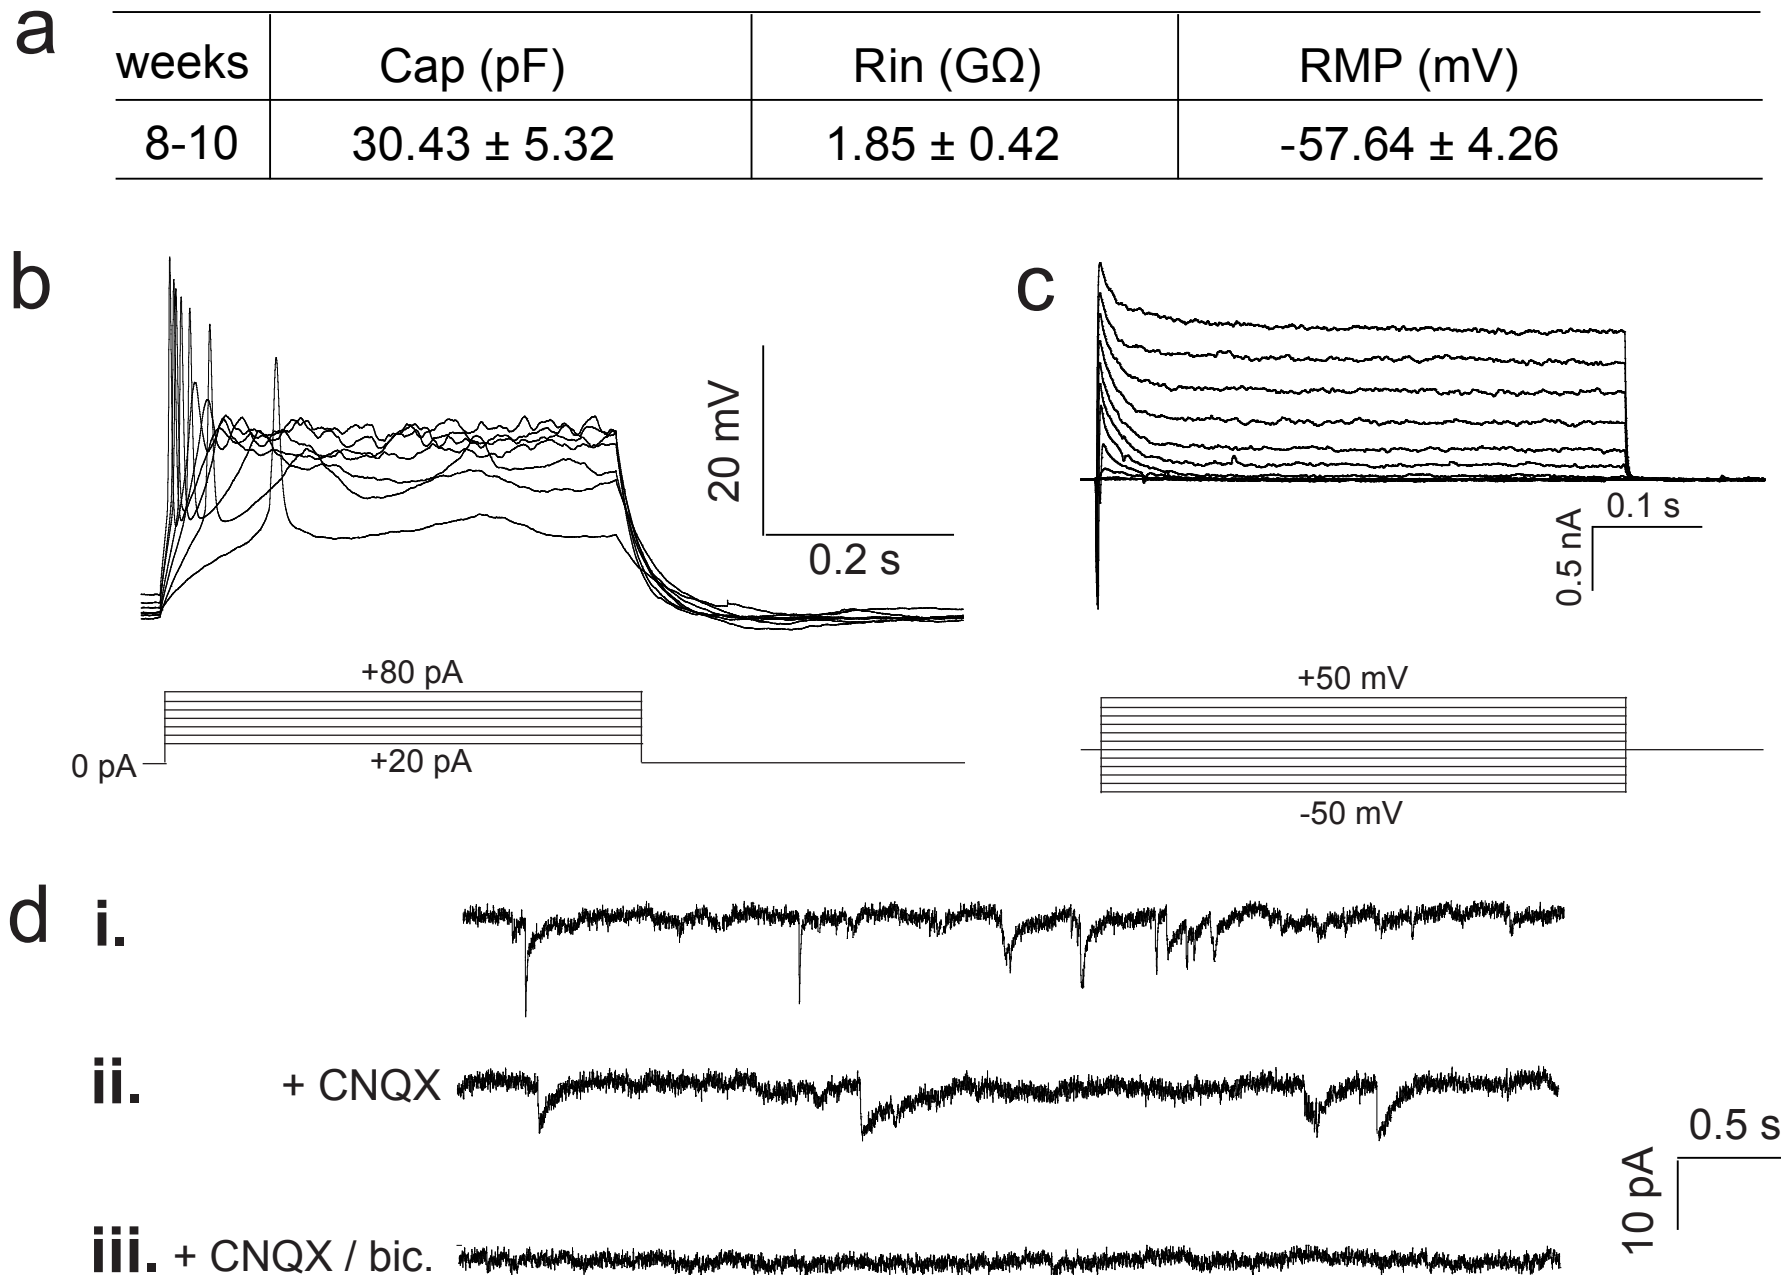

## Supplementary figure 2. Electrophysiological properties of hESC-derived neurons.

(A) Electrophysiological characteristics of hESC-derived neurons which were differentiated for 8-10 weeks in vitro. (B) Action potentials were induced by +20 pA to +80 pA current injections. (C) Inward and outward currents were triggered upon -50mV to 50 mV voltage steps. (D) Spontaneous synaptic currents were recorded (i), the AMPA receptor activity was blocked by CNQX (ii), and the GABA receptor activities were further eliminated by application of bicuculline in the presence of CNQX.

# Supplementary Figure 3 (Zhang)

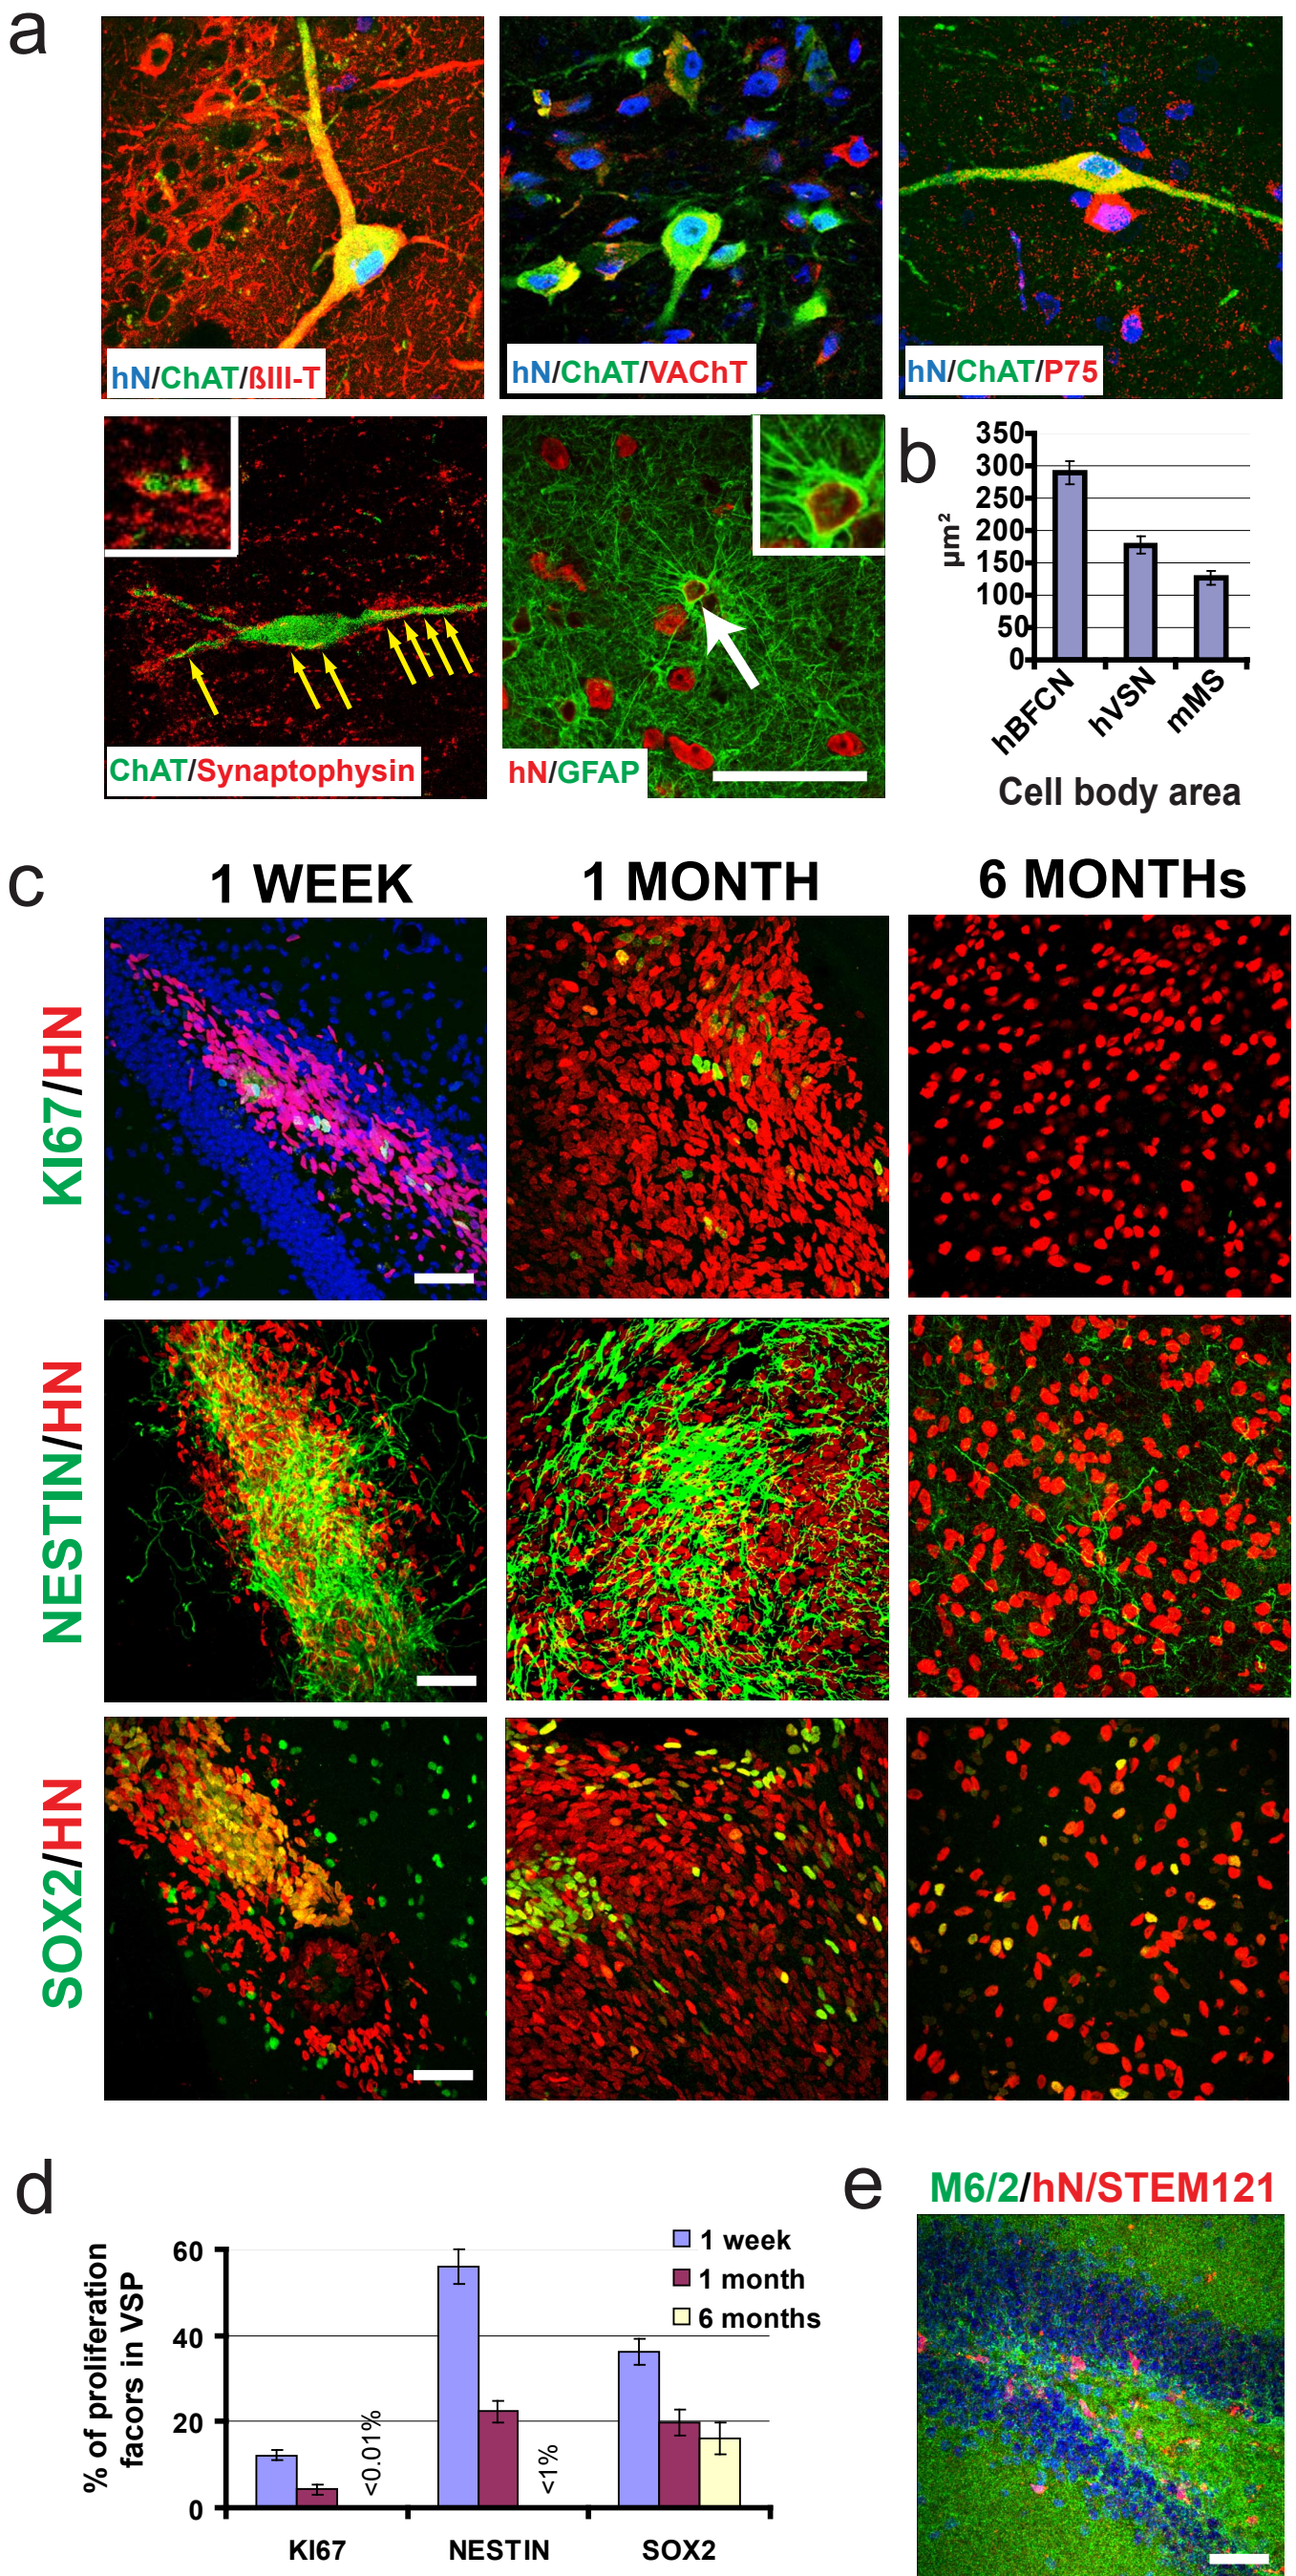

## Supplementary figure 3. Characteristics of grafted human cells.

(A) Human ChAT+ co-expressed  $\beta$ III-Tubulin, VAcHT, P75, and synaptophysin. Yellow arrows indicate synapses surrounding CHAT+ neurons, and the inset illustrates higher magnification of the area marked by the white arrow. (B) CHAT+ cell body area in the human MGE graft was larger than that in human VSP grafts and mouse BFCNs in the medial septum (mMS). (C) Cell proliferation and progenitor population at 1 week, 1 month, and 6 months post transplantation. (D) Proportion of KI67-, Nestin-, and SOX2-expressing cells among total human (hN+) cells at 1 week, 1 month, and 6 months post-transplantation in VSP. (E) Mouse markers M2/6 and human markers hN and STEM121 are not co-labeled.  $\beta$ III-T =  $\beta$ III-Tubulin; Syn = Synaptophysin; S121 = STEM121. All Scale Bars = 50  $\mu$ m.

# Supplementary Figure 4 (Zhang)

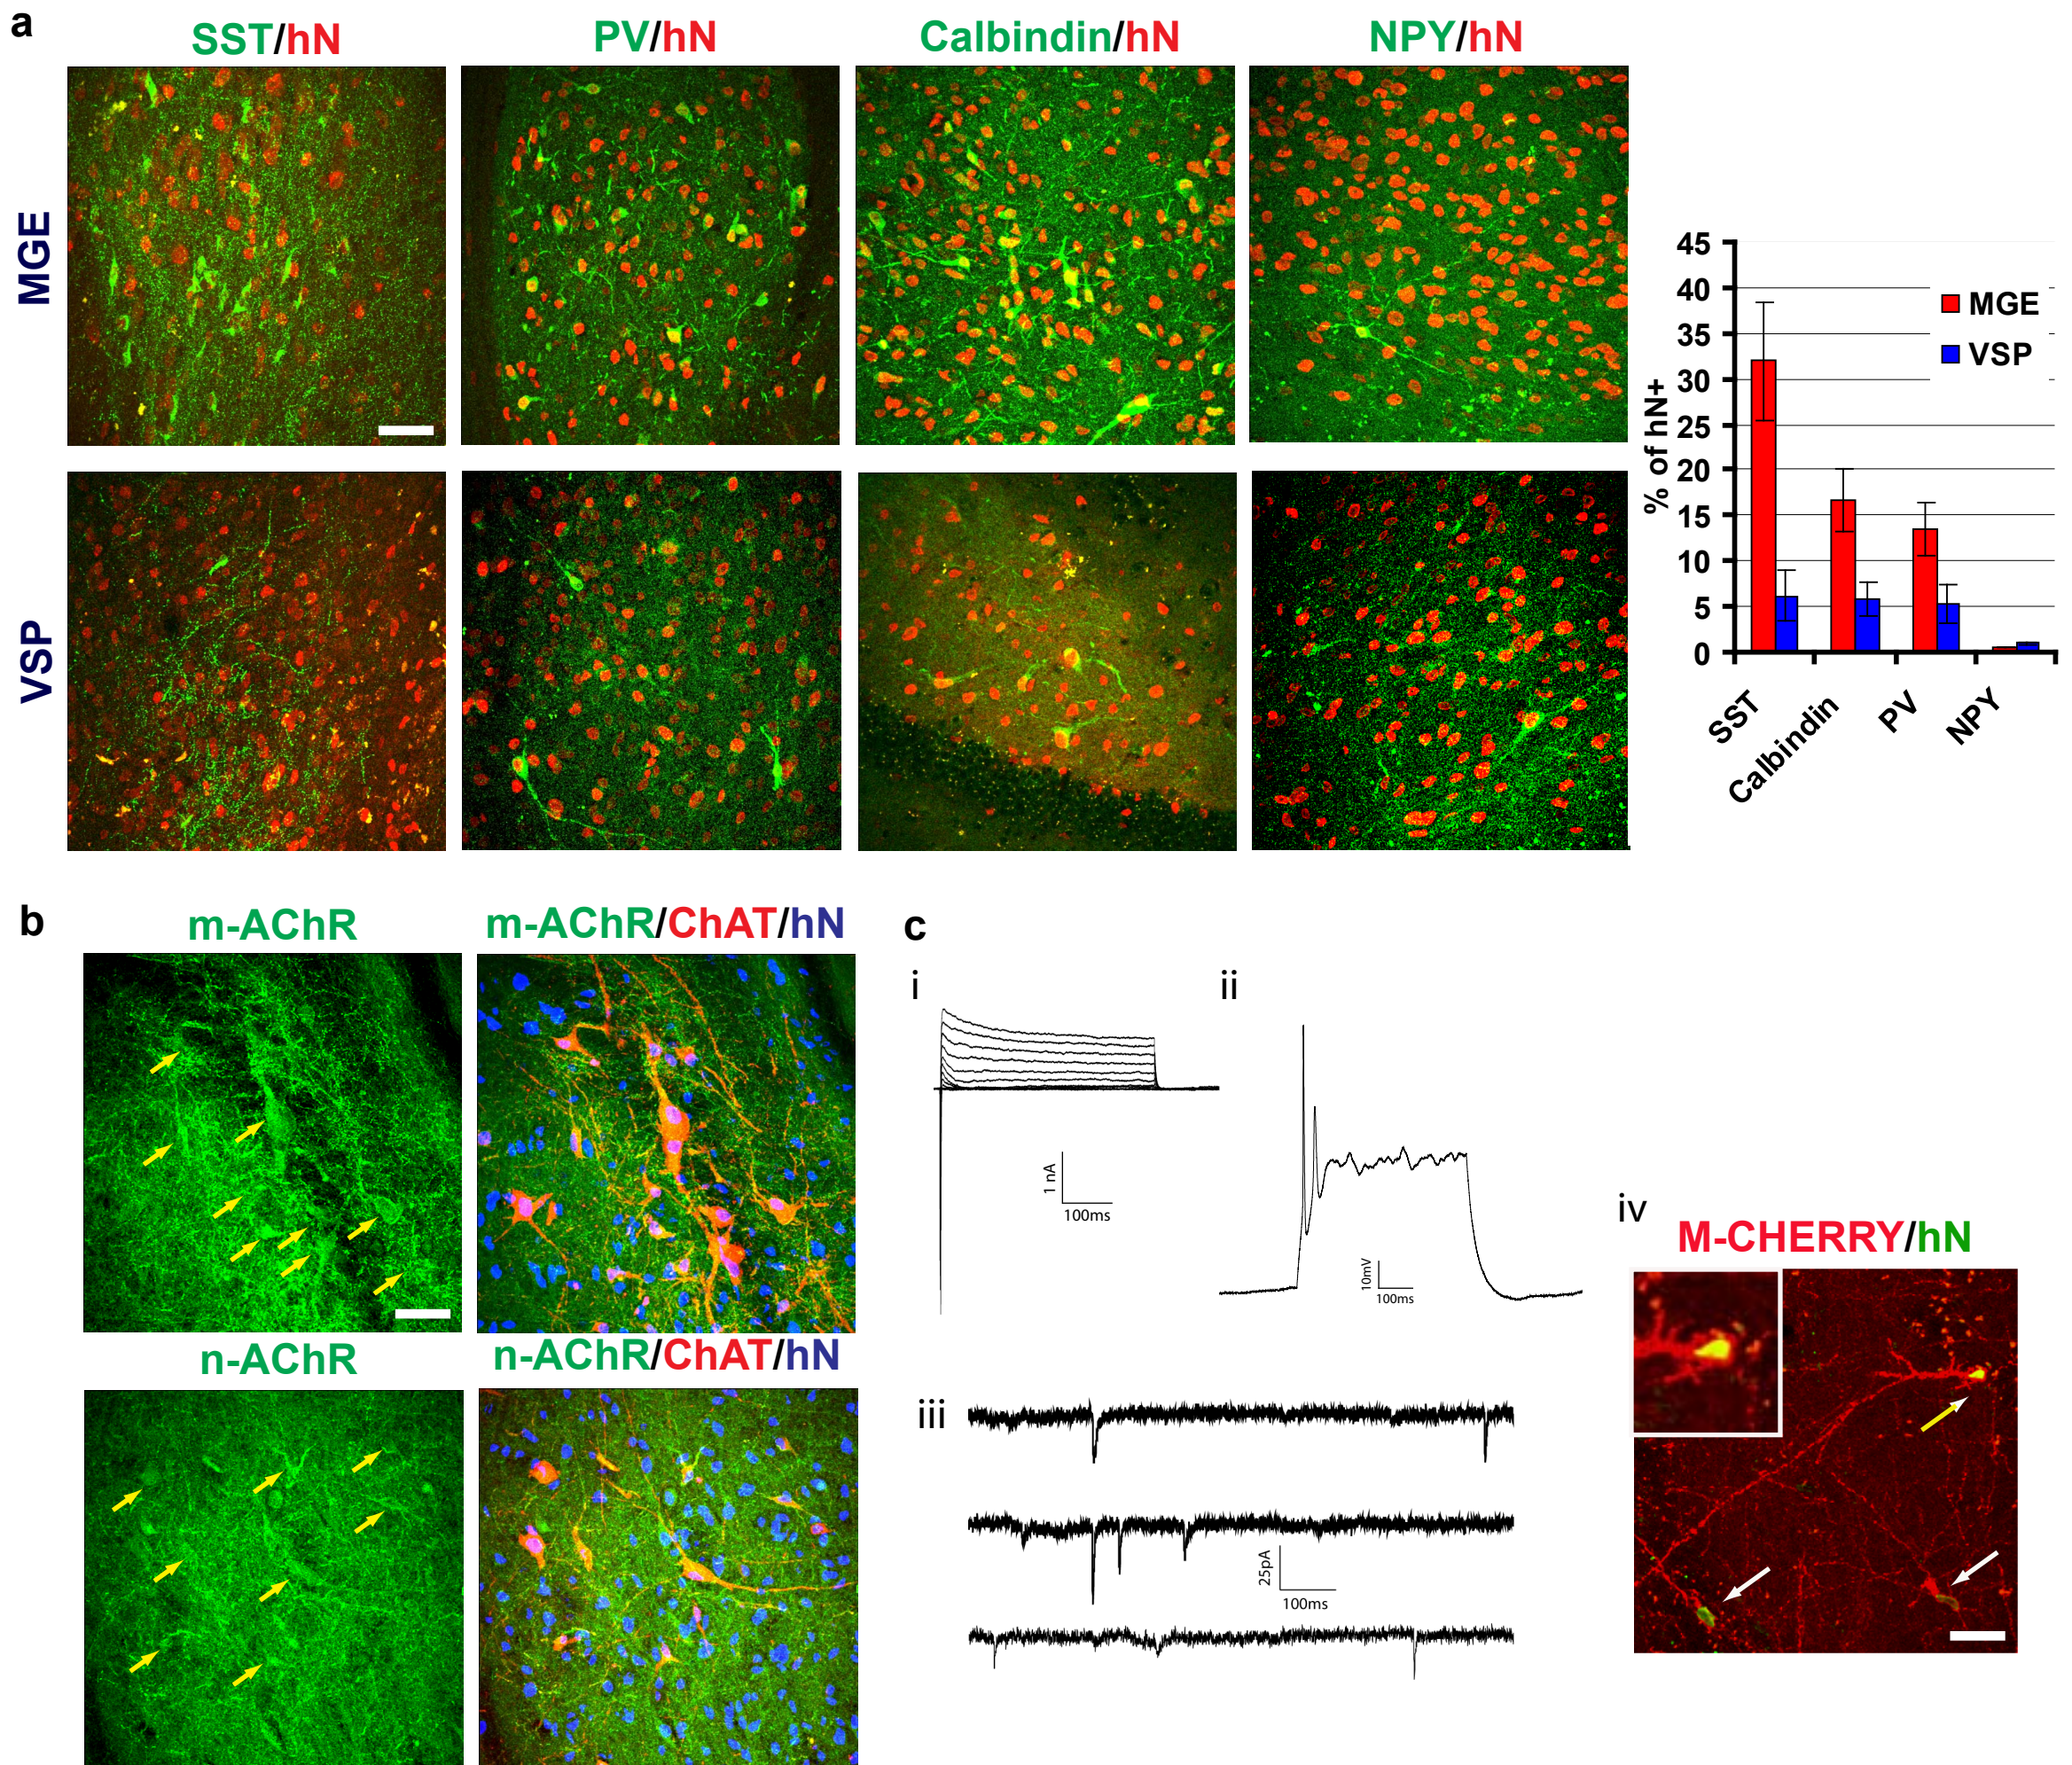

## Supplementary figure 4. Subtypes and electrophysiological properties of grafted human neurons.

(A) GABA interneuron subtypes in the MGE and VSP groups. (B) Human cholinergic neurons (hN+/ChAT+) co-expressed muscarinic (m-AChR) and nicotinic (n-AChR) receptors (arrows). (C) (i) Inward and outward currents were triggered in grafted neurons. (ii) Grafted neurons fired action potentials. (iii) Spontaneous synaptic currents were recorded. (iv) m-cherry positive cells are hN positive, arrows point the neurons migrated out of the graft. Inset is showing higher magnification of co-label with hN and M-CHERRY. All Scale Bars =50  $\mu$ m.

# Supplementary Figure 5 (Zhang)

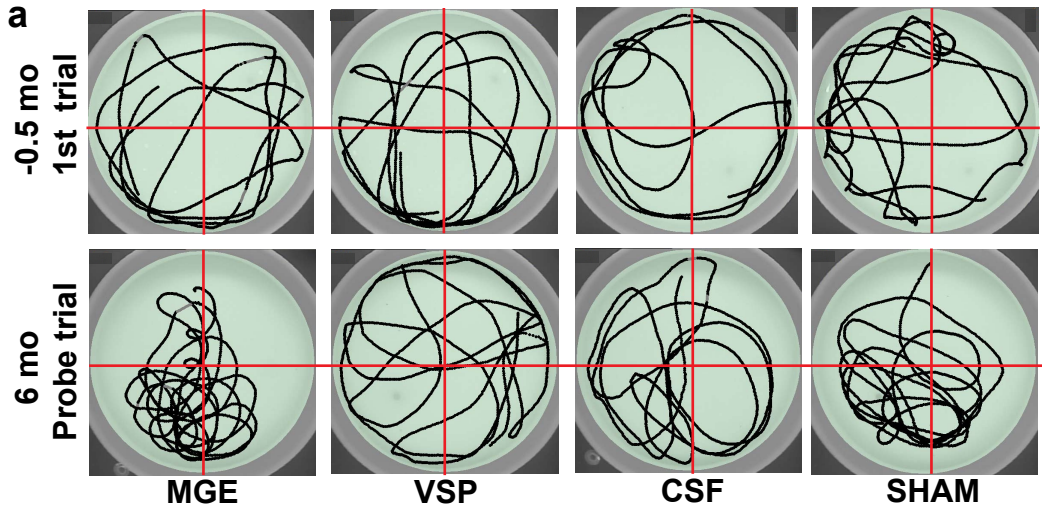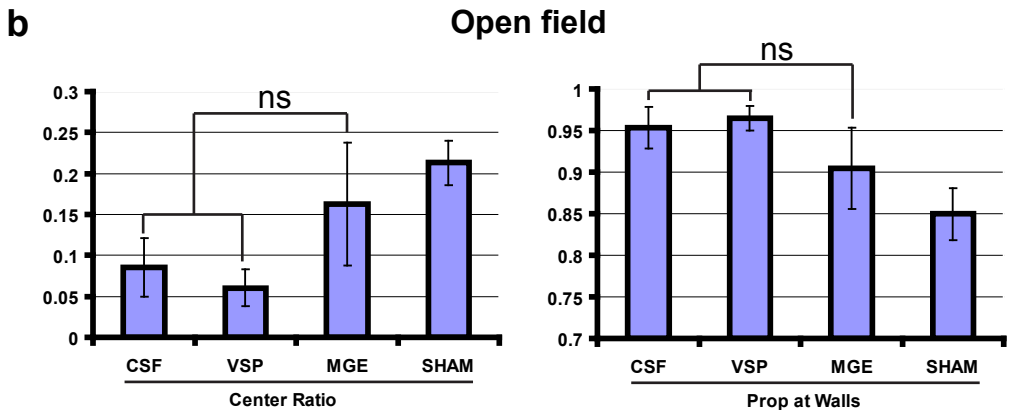

## Supplementary figure 5. Transplantation of hESC-derived MGE progenitors contributes to functional recovery.

(A) (i) Swimming traces from the first trials before transplantation for each group. Each groups are similar, which all are tend to close to the wall.

(ii) Swimming traces from the probe trials for each group. Similar with SHAM animals, MGE transplanted group had significant more crossings and spent more time in the platform quadrant than other 3 quadrants.

(B) There are no significant differences among the three lesioned groups in open field tests.

**Supplementary Table 1. Behavioral tests subgroups**

| Group name | Animal number | Lesion (P75-SAP injection) | Transplantation |
|------------|---------------|----------------------------|-----------------|
| MGE        | 13            | Yes                        | MGE progenitors |
| VSP        | 9             | Yes                        | VSP progenitors |
| CSF        | 7             | Yes                        | Injected CSF    |
| SHAM       | 10            | No (injected CSF instead)  | No surgery      |

**Supplementary Table 2. Side-by-side comparison with Bissonnette's method**

|                               | Liu et al             | Bissonnette et al                                |
|-------------------------------|-----------------------|--------------------------------------------------|
| Differentiation method        | Chemically defined    | Matrigel + suspension                            |
| Retinoic acid (RA)            | None                  | 10 $\mu$ M                                       |
| bFGF                          | None                  | 4ng/ml                                           |
| SHH                           | Day 10-25 1,000 ng/ml | Day 15-17 200 ng/ml<br>Day18 100 ng/ml           |
| FGF8                          | None                  | 100 ng/ml                                        |
| BMP9                          | None                  | 10 ng/ml, 3 days (day 18-21)                     |
| Ara C                         | None                  | 2.66 $\mu$ M                                     |
| Cellular identity             | 38% BFCN              | 85% BFCN                                         |
| MGE progenitors               | Yes (93%)             | Yes (85%, but only some are FoxG1+ in cytoplasm) |
| ChAT                          | Yes                   | Yes                                              |
| Co-expression w/ FOXG1        | Yes                   | None                                             |
| Co-expression w/ NKX2.1       | Yes                   | None                                             |
| Co-expression w/VACHT         | Yes                   | Yes, also in MAP2- cells                         |
| MGE-derived GABA neurons      | Yes                   | None                                             |
| electrophysiological property | Yes                   | Yes when co-cultured w/brain slices              |
| Transplantation               | Yes                   | No.                                              |



**Supplementary Table 3. Antibodies**

| Antibody       | Isotype    | Dilution | Source               |
|----------------|------------|----------|----------------------|
| MAP2           | Mouse IgG  | 1:1,000  | Chemicon & Millipore |
| BMPI (VGLUT1)  | Goat IgG   | 1:100    | Santa Cruz           |
| Calbindin      | Rabbit IgG | 1:1,000  | Chemicon & Millipore |
| Calretinin     | Rabbit IgG | 1:200    | Epitomics            |
| ChAT           | Goat IgG   | 1:300    | Chemicon & Millipore |
| DARPP32        | Rabbit IgG | 1:1,000  | Chemicon & Millipore |
| EN1            | Mouse IgG  | 1:1,000  | DSHB, Iowa City, IA  |
| FOXG1          | Rabbit IgG | 1:100    | Abcam                |
| GABA           | Rabbit IgG | 1:10,000 | Sigma                |
| GABA           | Mouse IgG  | 1:100    | Sigma                |
| GAD65          | Rabbit IgG | 1:5,000  | Chemicon & Millipore |
| GFAP           | Rabbit IgG | 1:5,000  | DAKO                 |
| HOXB4          | Rat IgG    | 1:50     | DSHB, Iowa City, IA  |
| Human Nuclei   | Mouse IgG  | 1:200    | Chemicon & Millipore |
| Human Tau      | Mouse IgG  | 1:200    | ZYMED                |
| ISLET1         | Mouse IgG  | 1:500    | DSHB, Iowa City, IA  |
| KI67           | Rabbit IgG | 1:200    | ZYMED                |
| mAChR          | Rat IgG    | 1:500    | Synaptic system      |
| MEIS 1/2       | Goat IgG   | 1:500    | Santa Cruz           |
| nAChR          | Rat IgG    | 1:100    | Sigma                |
| Nestin         | Goat IgG   | 1:2,000  | Santa Cruz           |
| Neuropeptide Y | Rabbit IgG | 1:200    | ImmunoStar           |
| NKX2.1         | Mouse IgG  | 1:500    | Chemicon & Millipore |
| P75            | Rabbit IgG | 1:500    | Chemicon & Millipore |
| Parvabumin     | Rabbit IgG | 1:2,000  | Abcam                |
| Parvabumin     | Mouse IgG  | 1:1,000  | Sigma                |
| PAX6           | Rabbit IgG | 1:1,000  | Covance              |

|                           |            |          |                           |
|---------------------------|------------|----------|---------------------------|
| Somatostatin and receptor | Rat IgG    | 1:500    | Chemicon & Millipore      |
| SOX2                      | Goat IgG   | 1:1,000  | R&D                       |
| $\beta$ III-tubulin       | Rabbit IgG | 1:10,000 | Covance Research Products |
| $\beta$ III-tubulin       | Chick IgG  | 1:1000   | Chemicon & Millipore      |
| STEM121                   | Mouse IgG  | 1:500    | StemCells                 |
| Synapsin                  | Rabbit IgG | 1:1,000  | CALBIOCHEM                |
| Synaptophysin             | Mouse IgG1 | 1:1000   | Chemicon & Millipore      |
| VACHT                     | Rabbit IgG | 1:1,000  | Sigma                     |
| VGLU                      | Rabbit IgG | 1:1,000  | Synaptic System           |

**Supplementary Table 4. Primers (5' to 3') for quantitative reverse-transcription PCR**

| Human gene    | Forward                   | Reverse                    |
|---------------|---------------------------|----------------------------|
| <i>Emx1</i>   | TTCAATGGGAGAGGGAGAGTG CTT | CCG TCAGCCTTTGTGAATGGT GTT |
| <i>Lhx6</i>   | ACAGATCTACGCCAGCGACT      | CATGGTGTCGTAGTGGATGC       |
| <i>Mash1</i>  | GTCTCCCGGGGATTTTGTAT      | TCTCCATCTTGGCAGAGCTT       |
| <i>Lhx8</i>   | CCAAAACCAGCAAAAAGAGC      | TGGCGTGCTCTACAATTCTG       |
| <i>Islet1</i> | GTTTGAAATGTGCGGAGTGTAAT   | TTCTTGCTGAAGCCGATGC        |
| <i>Nkx2.1</i> | CGCATCCAATCTCAAGGAAT      | CAGAGTGTGCCAGAGTGAA        |
| <i>Pax6</i>   | ACAGATCTACGCCAGCGACT      | CATGGTGTCGTAGTGGATGC       |
| <i>Olig2</i>  | GGTAAGTGCGCAATGCTAAGCTGT  | TACAAAGCCCAGTTTGCAACGCAG   |
| <i>Gapdh</i>  | TCGACAGTCAGCCGCATCTTCTTT  | ACCAAATCCGTTGACTCCGACCTT   |
